# Supplementary material for: The ornamental stones of the Roman thermal baths of Teate Marrucinorum (Chieti, Italy): autoptic, geochemical and minero-petrographic multi-analytical characterisations
Source: Research Square preprint supplement (doi:10.21203/rs.3.rs-7979889/v1), 2025-11-11
Supplement: Supplementary file 1 [file 0ee38e238650f9370739ea96.xlsx]

## Sheet: Tab. S1
	Tab. S1. Sample labels, position, number of specimens and types of analyses conducted on the ornamental polychrome stones, grey striped and white marbles of the thermal bath of Teate Marrucinorum (Chieti)
	category	samples	position inside the thermae	number of specimens	TS	AD	TOM	XRF-EDS	isotopic signature	XRPD	Raman
									(δ18O; δ13C)
	polychrome stones	PNORN-1	apodyterium	7	1	X	X	X	-	X	X
		PNORN-2A	frigidarium (cold tub)	5	1	X	X	X	-	X	X
		PNORN-X1	Unknown	10	1	X	X	X	-	X	X
		PNORN-2C-1	frigidarium (cold tub)	5	1	X	X	X	-	X	X
		PNORN-2C-2	frigidarium (cold tub)	6	1	X	X	X	-	X	X
		PNORN-2C-3	frigidarium (cold tub)	11	1	X	X	X	-	X	X
		PNORN-4	Tepidarium	1	1	X	X	X	-	X	X
	grey-striped	PNORN-3	Apodyterium	5	1	X	X	X	X	X	X
	white marbles	PNORN-2B	frigidarium (cold tub)	1	1	-	X	X	X	X	X
		PNORN-X2	unknown	5	5	-	X	X	X	X	-
	Footnotes: TS = thin section; AD = Autoptic Determination; TOM = Transmission Optical Microscope; XRF-EDS = X-Ray Fluorescence – Energy dispersive spectrometry; XRPD = X-Rays Powder Diffraction.

## Sheet: Tab. S2
	Tab. S2. Autoptic determinations and petrographic characteristics (via TOM observations)
	category	sample	autoptic determination	texture	microstructure	phase boundaries	MGS (mm)
	polychrome stones	PNORN-1	Pavonazzetto antico	He	mosaic	embayed	2.7
		PNORN-2A	Cipollino verde	Ho/He	foliated	embayed	2.1
		PNORN-X1	Portasanta	Mc/Crp	brecciated	-	1.6*
		PNORN-2C-1	Breccia di Settebasi	Mc/Crp	brecciated	-	0.8
		PNORN-2C-2	Breccia di Settebasi	Mc/Crp	brecciated	-	0.7
		PNORN-2C-3	Breccia di Settebasi	Mc/Crp	brecciated	-	1.7
		PNORN-4	Breccia di Settebasi	Mc/Crp	brecciated	-	2.4
	grey-striped	PNORN-3	Greco scritto	He	mosaic	embayed to sutured	2.7
	white marbles	PNORN-2B	-	He	mortar	embayed to sutured	3.7
		PNORN-X2	-	He	mortar	embayed to sutured	2.6
		PNORN-X2-a	-	Ho/He	mosaic	curved ± straight	0.8
		PNORN-X2-b	-	Ho	mosaic tending to polygonal. with triple joints	straight ± curved	0.7
		PNORN-X2-c	-	He	mortar	embayed to sutured	2.9
		PNORN-X2-d	-	Ho	mosaic. with rare triple joints	curved. straight	0.6
	Footnotes: *Recrystallized calcite in veins; Ho = homeoblastic; He = heteroblastic; Mc = micritic; Crp = cryptocrystalline.

## Sheet: Tab. S3
	Tab. S3. Chemical compositions by XRF-EDS and isotopic signature of the analysed samples
	category	major oxides (wt. %)	autoptic determination	SiO2	TiO2	Al2O3	Fe2O3	MgO	MnO	CaO	K2O	SrO	SnO2	LOI	Tot.	isotopic signature (‰ VPDB)	δ18O	δ13C
	polychrome stones	PNORN-1	Pavonazzetto antico	1.1	0.1	1.2	0.6	0.3	< LOD	54.1	< LOD	< LOD	< LOD	42.6	99.9	PNORN-1	-	-
		PNORN-2A	Cipollino verde	4.8	0.1	1.1	1	0.8	0.1	52.1	0.3	0.1	< LOD	39.5	100	PNORN-2A	-	-
		PNORN-X1	Portasanta	1.3	< LOD	0.3	0.2	1.3	< LOD	53.8	0.1	< LOD	< LOD	42.9	99.9	PNORN-X1	-	-
		PNORN-2C-1	Breccia di Settebasi	0.5	< LOD	0.3	1.5	0.5	< LOD	54.1	< LOD	< LOD	< LOD	42.9	99.7	PNORN-2C-1	-	-
		PNORN-2C-2		0.4	< LOD	0.3	0.7	0.4	< LOD	55.3	< LOD	< LOD	< LOD	42.9	99.9	PNORN-2C-2	-	-
		PNORN-2C-3		0.8	< LOD	0.5	0.8	2.1	< LOD	52.9	< LOD	< LOD	< LOD	42.8	99.9	PNORN-2C-3	-	-
		PNORN-4		1.5	0.1	0.8	2.7	0.8	< LOD	52.6	< LOD	< LOD	< LOD	41.5	99.9	PNORN-4	-	-
		average (PNORN-2C-1,2C-2, 2C-3, 4)		0.8	0.1	0.475	1.425	0.95	-	53.725	-	-	-	42.525	99.85		-	-
	grey-striped	PNORN-3	Greco scritto	0.3	< LOD	0.1	0.1	0.3	< LOD	56.1	< LOD	< LOD	< LOD	43	99.9	PNORN-3	-2,82	2.86
		PNORN-3-A		0.2	< LOD	0.2	< LOD	0.2	< LOD	56.3	-	< LOD	< LOD	43	99.8	PNORN-3-A	-2,71	3.46
		PNORN-3-B		0.2	< LOD	0.1	< LOD	0.3	< LOD	56.7	-	0.05	< LOD	42.6	99.9	PNORN-3-B	-2,92	4.22
		PNORN-3-C		0.1	< LOD	0.1	< LOD	0.5	< LOD	56.9	-	< LOD	< LOD	42.3	99.9	PNORN-3-C	-3,03	3.9
		PNORN-3-D		0.2	< LOD	0.3	0.1	0.9	< LOD	55.2	-	< LOD	< LOD	43.3	99.9	PNORN-3-D	-2,52	2.26
		average (PNORN-3,3-a, 3-b, 3-c, 3-d)		0.2	-	0.2	0.1	0.4	-	56.2	-	0.05	-	42.8	99.9
	white marbles	PNORN-2B	-	0.1	< LOD	0.1	< LOD	0.6	< LOD	57.4	< LOD	< LOD	< LOD	41.8	99.9	PNORN-2B	-1,54	2.18
		PNORN-X2	-	0.3	< LOD	0.1	< LOD	0.6	< LOD	55.6	< LOD	< LOD	< LOD	43.3	99.9	PNORN-X2	-2,03	2.75
		PNORN-X2-A	-	0.1	< LOD	0.2	< LOD	0.5	< LOD	55.9	-	< LOD	< LOD	43.2	99.9	PNORN-X2-A	-1,83	2.25
		PNORN-X2-B	-	0.2	< LOD	0.1	< LOD	0.5	< LOD	56.6	-	< LOD	< LOD	42.5	99.9	PNORN-X2-B	-2,19	2.34
		PNORN-X2-C	-	0.1	< LOD	0.3	< LOD	0.6	< LOD	55.5	-	< LOD	< LOD	43.5	99.9	PNORN-X2-C	-2,31	3.5
		PNORN-X2-D	-	0.2	< LOD	0.2	< LOD	0.5	< LOD	56	-	< LOD	< LOD	43	99.9	PNORN-X2-D	-1,95	2.24
	Footnotes: LOI = Loss On Ignition; LOD = limit of detection, ≈ 0.05 wt.%.

## Sheet: Tab. S4
	Tab. S4. Amount of crystalline phases (wt.%) by XRPD and RIR determinations; Raman peaks are evidenced as a function of their intensity (HI/LI)
	category	sample name	method	autoptic determination	calcite	aragonite	dolomite	quartz	a-feldspar	illite	muscovite	clinochlore	talc	hematite	rutile
	polychrome stones	PNORN-1	XRPD	Pavonazzetto antico	98.5			0.5	1
			Raman		HI				LI
		PNORN-2A	XRPD	Cipollino verde	83.5		0.5	3			7	6
			Raman		HI			LI
		PNORN-X1	XRPD	Portasanta	92		5.5	2.5
			Raman		HI			LI
		PNORN-2C-1	XRPD	Breccia di Settebasi	98.5			0.5						1
			Raman		HI
		PNORN-2C-2	XRPD		98.5			0.5						1
			Raman		HI
		PNORN-2C-3	XRPD		90		3	3				3		1
		PNORN-4	XRPD		93.5			0.5				3	2	1
			Raman		HI	LI								LI
	Grey-stripped	PNORN-3	XRPD	Greco scritto	94.5		1.5	1		3
			Raman		HI		LI
		PNORN-3-a	XRPD		98		1	1
		PNORN-3-b	XRPD		97		2	1
		PNORN-3-c	XRPD		97		2	1
		PNORN-3-d	XRPD		95		1	1		3
	white marbles	PNORN-2B	XRPD	-	97			1		2
		PNORN-X2	XRPD	-	97.5			0.5		2
		PNORN-X2-a	XRPD	-	99			1
		PNORN-X2-b	XRPD	-	98			1							1
		PNORN-X2-c	XRPD	-	99			1
		PNORN-X2-d	XRPD	-	95			1		4
	Footnotes: HI = high intense and LI = low intense for Raman. Calcite and aragonite are CaCO3; dolomite is CaMg(CO3)2; quartz is SiO2; alkali feldspar is (K, Na)AlSi3O8; illite/muscovite KAl2(AlSi3O10)(F, OH)2; clinochlore of the chlorite group is (Mg, Fe2+)5Al(Si3Al)O10(OH)8; talc is Mg3Si4O10(OH)2; hematite is Fe2O3; rutile is TiO2.

## Sheet: Tab.S5
	Tab. S5. Provenance sites, ancient name, petrographic type and possible quarries of the ornamental stones of the thermal baths from Teate Marrucinorum (Chieti, Italy)
	sample	archaeological name	latin name	petrographic type	quarries location	excavations sites*
	PNORN-1	Pavonazzetto	Marmor phrygium	pure marble	Afyon (Turkey)	Çakırsaz
						(39.096389; 30.196389)
						Iscehisar
						(38.837222; 30.783889)
						Kestanecik
						(37.420370; 28.321601)
	PNORN-2A	Cipollino verde	Marmor carystium	impure marble	Euboea (Greece)	Aetos
						(38.011532; 24.446553)
						Kylindroi
						(38.050000; 24.465833)
						Mount Kionia
						(38.048889; 24.320833)
						Mount Oberes
						(38.048889; 24.320833)
						Mount Pyrgari
						(38.122500; 24.215000)
						Mount Vrethela
						(38.100003; 24.266765)
						Myloi
						(38.034446; 24.438152)
						Myrtia
						(38.260659; 24.20191)
						Styra
						(38.149722; 24.259722)
	PNORN-X1	Portasanta	Marmor chium	calcitic tectonic breccia	Chio Island (Greece)	Latomi
						(38.384987; 26.13516)
	PNORN-2C-1, PNORN-2C-2, PNORN-2C-3, PNORN-4	Breccia di Settebasi	Marmor scyreticum	calcitic metaconglomerate	Skyros Island (Greece)	Cape Kolona
						(38.846446; 24.35321)
						Cape Latomio
						(38.8039; 24.490752)
						Cape Marmaro
						(38.761624; 24.569607)
						Cape Oros
						(38.876368; 24.442813)
						Haghios Panteleimonas
						(38.856988; 24.48911)
						Koprisses
						(38.782559; 24.642248)
						Koulouri
						(38.871635; 24.438227)
						Renes
						(38.777222; 24.636944)
						Tres Boukes
						(38.771111; 24.6125)
	PNORN-3, PNORN-3-A, PNORN-3-B, PNORN-3-C, PNORN-3-D	Greco scritto		pure marble	Ephesos (Turkey)	Hasançavuslar
						(38.072140; 27.539680)
	PNORN-2B, PNORN-X2, PNORN-X2-C	Marmo proconnesio	Marmor proconnesium	pure marble	Ancient Prokonnesos (Turkey)	Marmara Adası
						(40.650833; 27.656944)
	PNORN-X2-A, PNORN-X2-B, PNORN-X2-D	Marmo di Luni	Marmor lunense	pure marble	Alpi Apuane (Italy)	Carrara
						(44.092500; 10.126667)
	Footnotes: *according to Russell (2013). The latitude and longitude of the sites are reported in brackets
