# Supplementary material for: The ornamental stones of the Roman thermal baths of Teate Marrucinorum (Chieti, Italy): autoptic, geochemical and minero-petrographic multi-analytical characterisations
Source: Research Square preprint supplement (doi:10.21203/rs.3.rs-7979889/v1), 2025-11-11
Supplement: Supplementary file 1 [file 45716ce215da217f28339c9f.pdf]

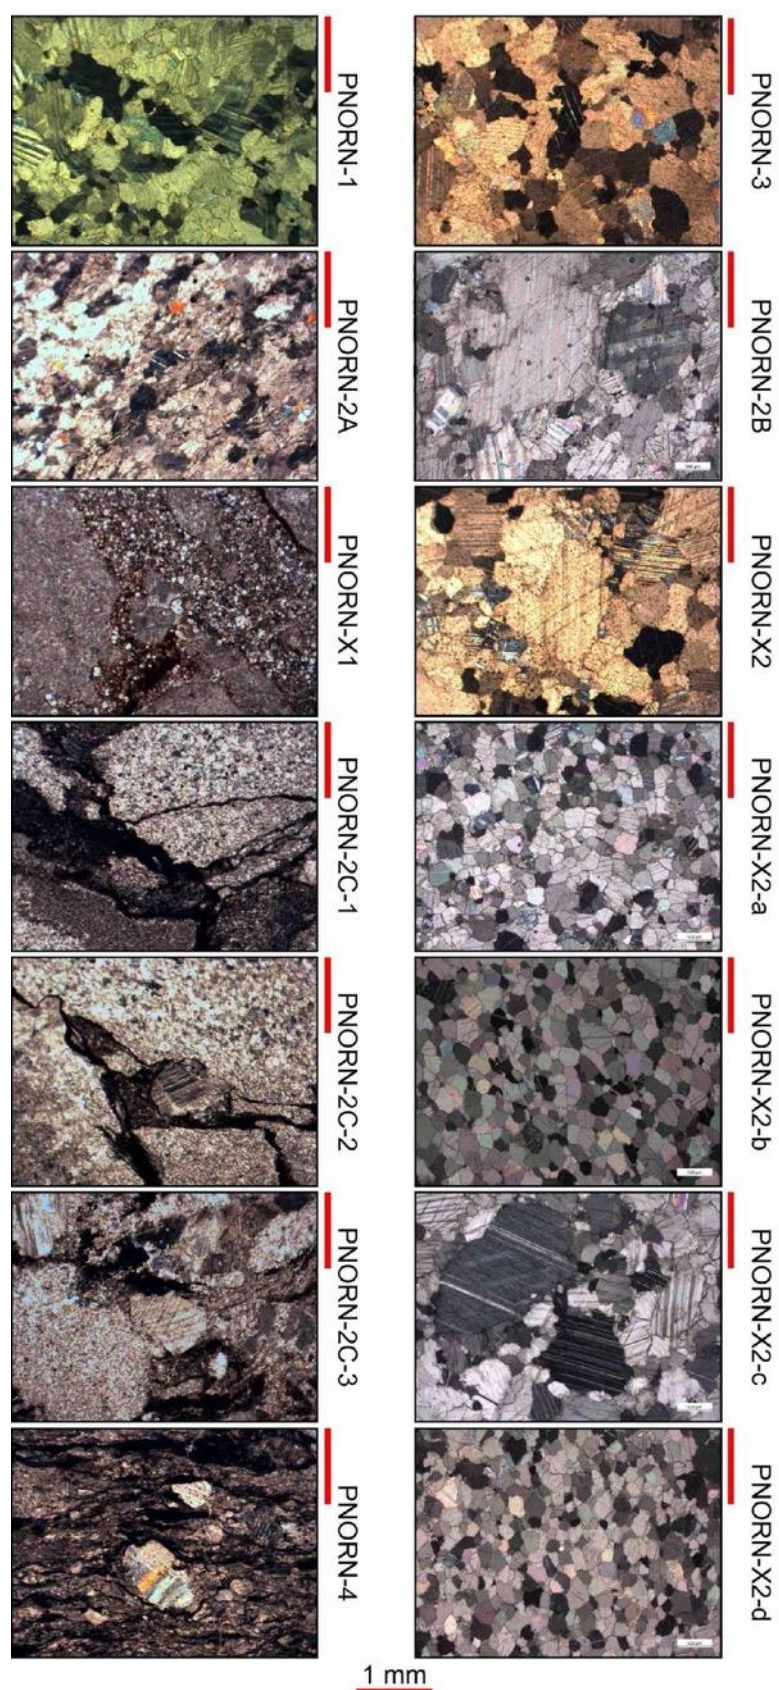

**Fig. S1** TOM microphotographs (XP: cross-polars, 25X) of polychrome samples (left column), *Greco scritto* (top-right column), and white marbles (right column except top-right image). Red bars are 1 mm

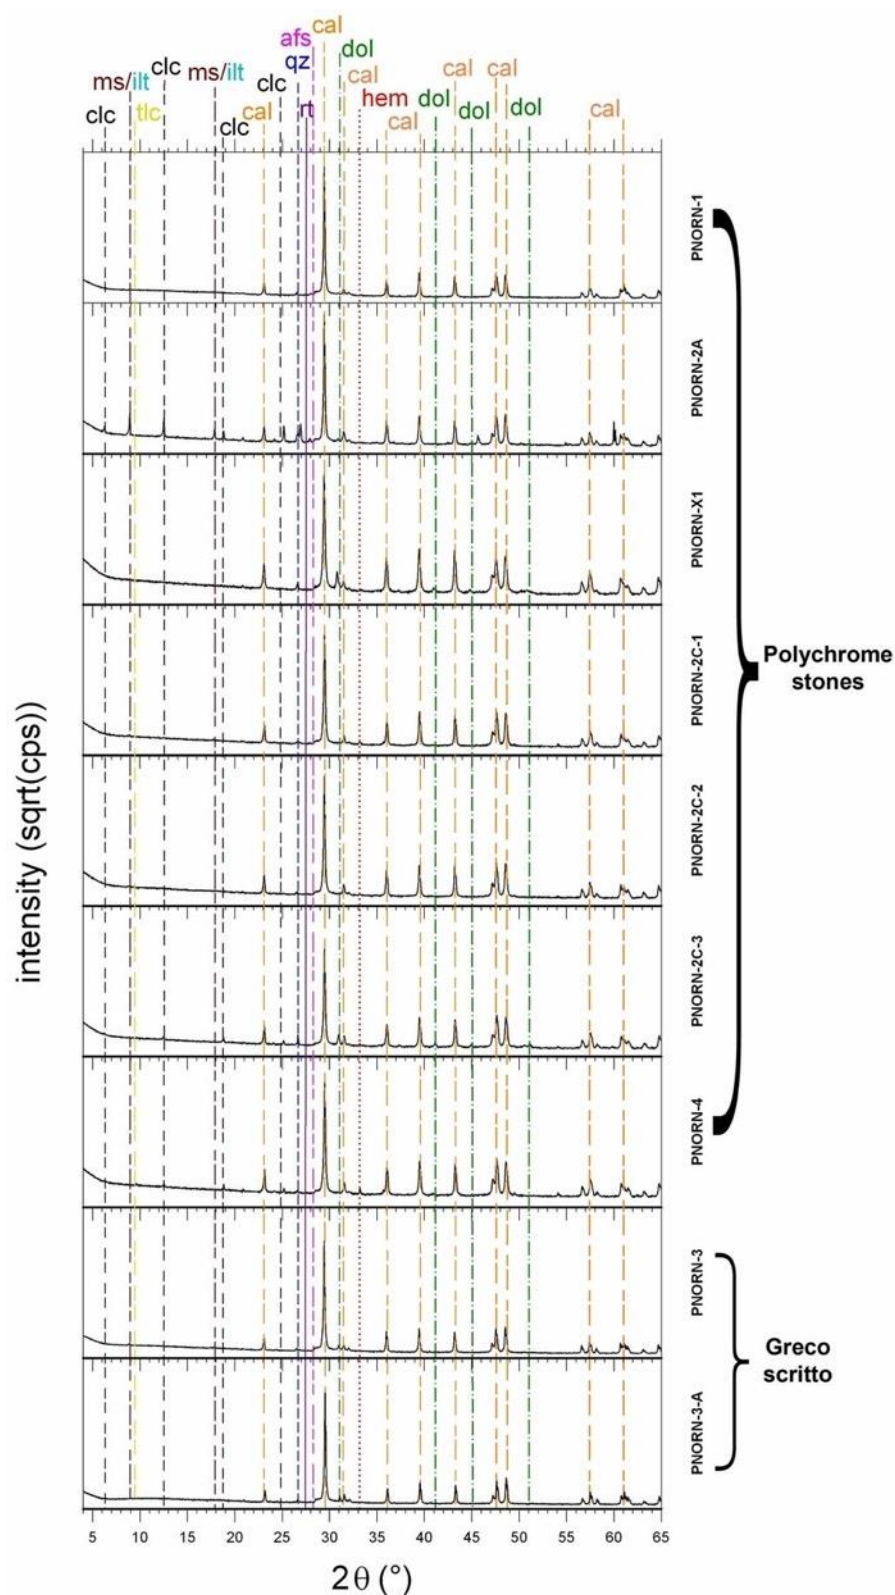

**Fig. S2a** Stacked XRPD patterns of polychrome and some *Greco scritto* stones. Intensities are expressed in square root to emphasise reflections with lower intensities. Vertical coloured lines indicate the position of the most intense Bragg reflections: cal = calcite, dol = dolomite, qz = quartz, afs = alkali feldspar, ms = muscovite; ilt = illite, clc = clinochlore, tlc = talc, hem = hematite, rt = rutile



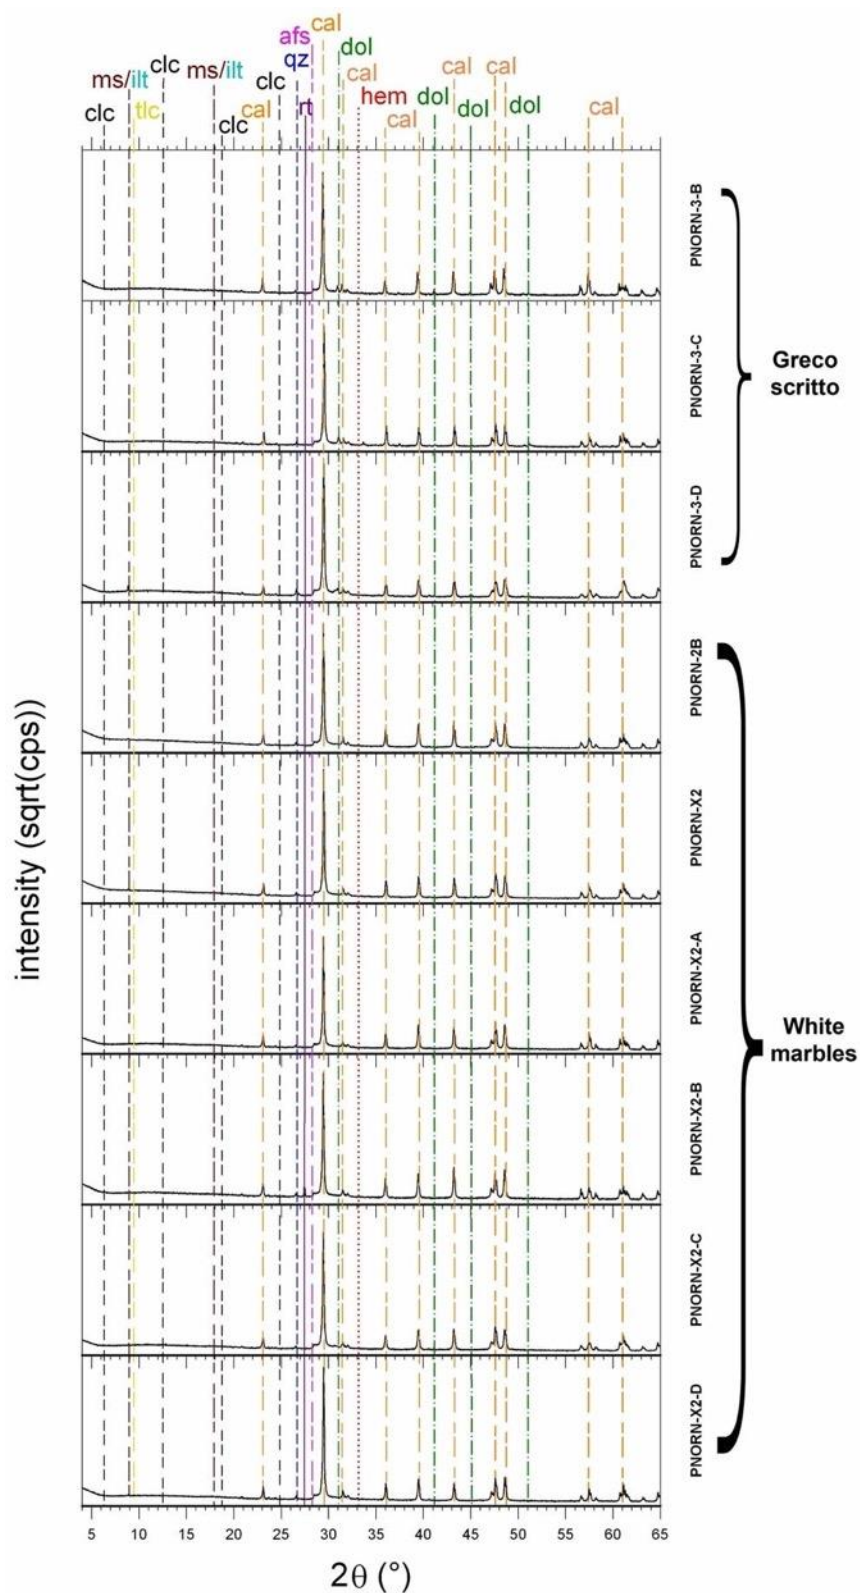

**Fig. S2b** Stacked XRPD patterns of some *Greco scritto* and white marble stones. Intensities are expressed in square root to emphasise reflections with lower intensities. Vertical coloured lines indicate the position of the most intense Bragg reflections: cal = calcite, dol = dolomite, qz = quartz, afs = alkali feldspar, ms = muscovite; ilt = illite, clc = clinochlore, tlc = talc, hem = hematite, rt = rutile

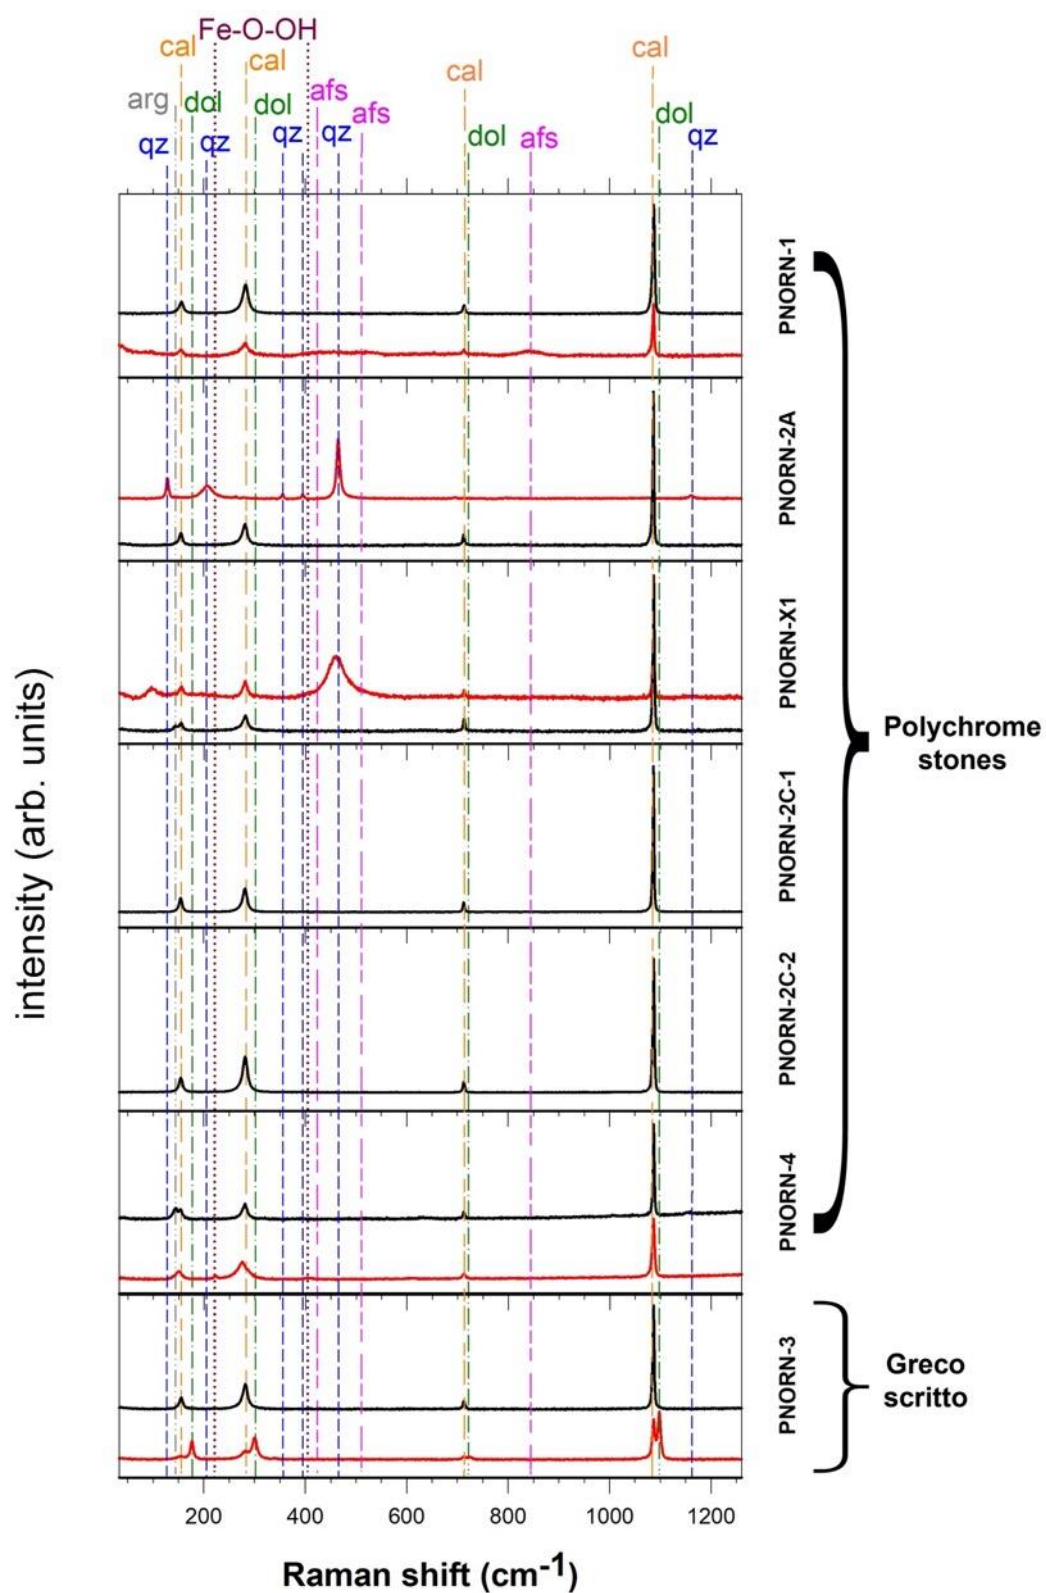

**Fig. S3** Selected representative Raman spectra in the 100-1250  $\text{cm}^{-1}$  region. For each marble sample, the most representative patterns are reported along with the position of the most intense Raman vibration: cal = calcite; dol = dolomite; arg = aragonite; qz = quartz; afs = alkali feldspar; Fe-O-OH = Fe oxide/hydroxide

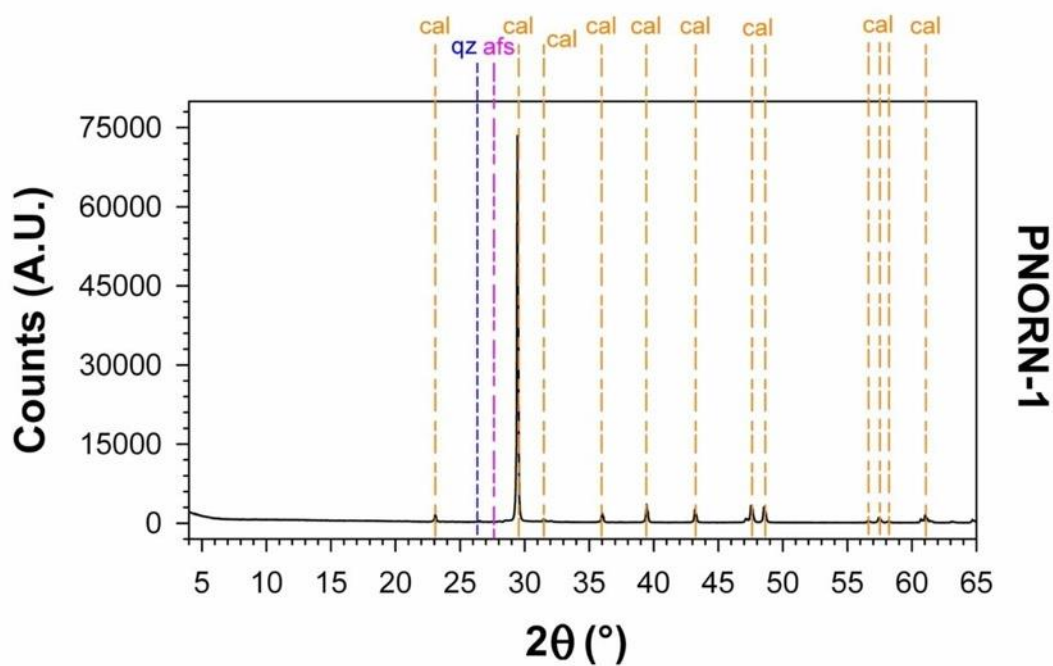

**Fig. S4** XRPD pattern of the sample PNORN-1. Vertical coloured lines indicate the position of the most intense Bragg reflections of cal = calcite, qz = quartz, afs = alkali feldspar.

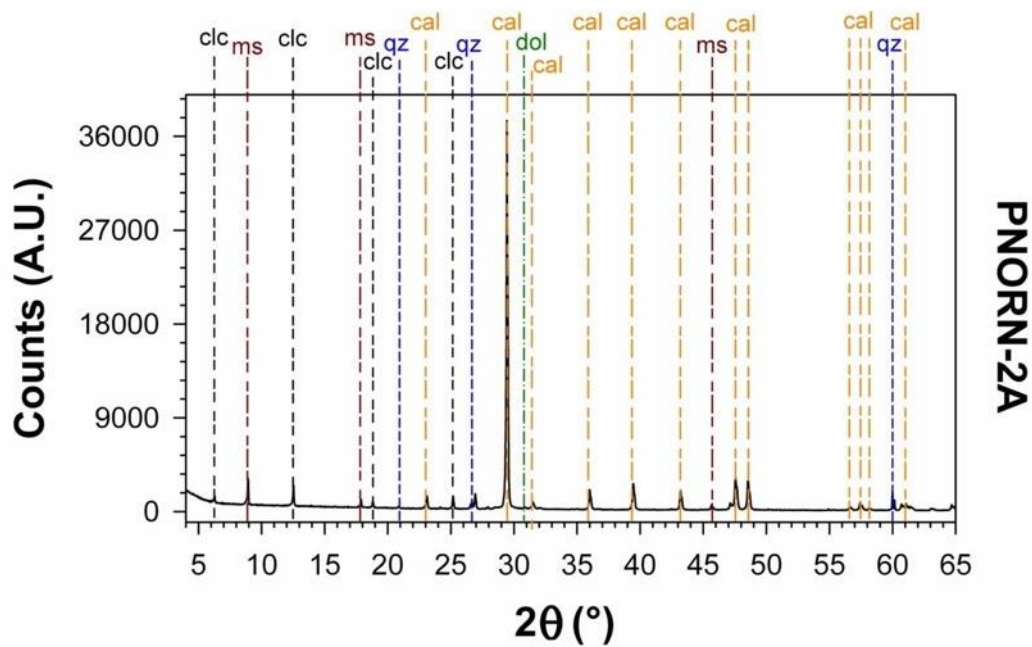

**Fig. S5** XRPD pattern of the sample PNORN-2A. Vertical coloured lines indicate the position of the most intense Bragg reflections of cal = calcite, dol = dolomite, qz = quartz, ms = muscovite, clc = clinocllore

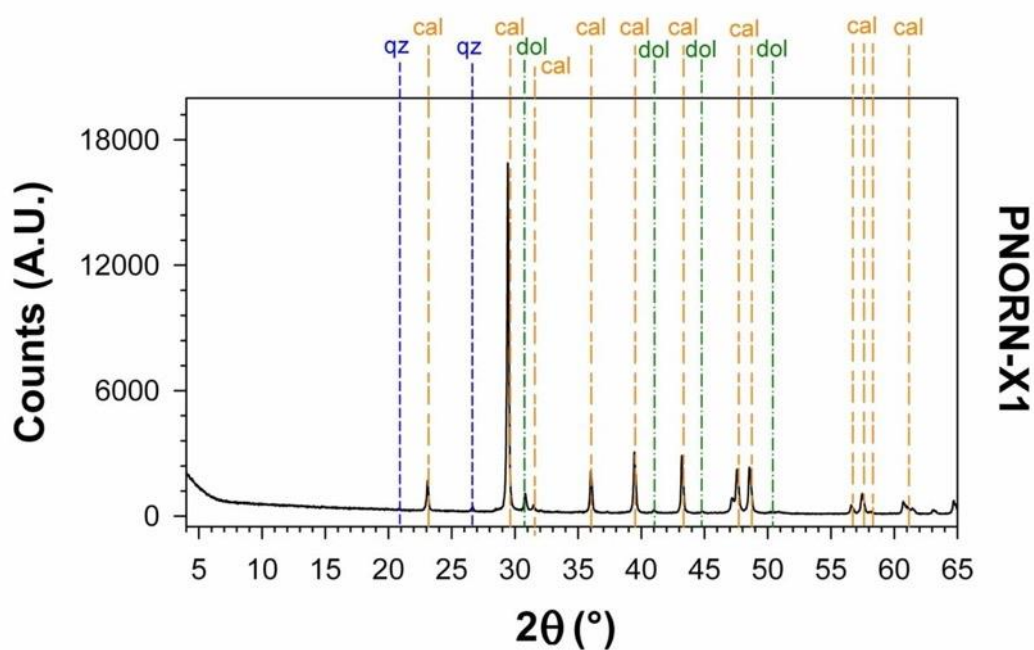

**Fig. S6** XRPD pattern for the sample PNORN-X1. Vertical coloured lines indicate the position of the most intense Bragg reflections of cal = calcite, dol = dolomite, qz = quartz.

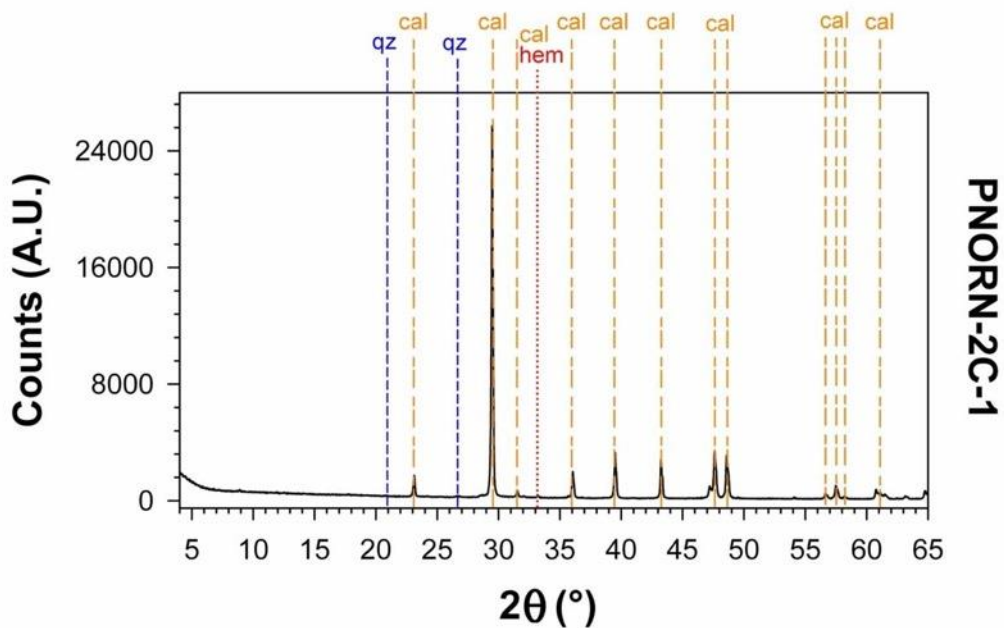

**Fig. S7** XRPD pattern of the sample PNORN-2C-1. Vertical coloured lines indicate the position of the most intense Bragg reflections of cal = calcite, hem = hematite, qz = quartz

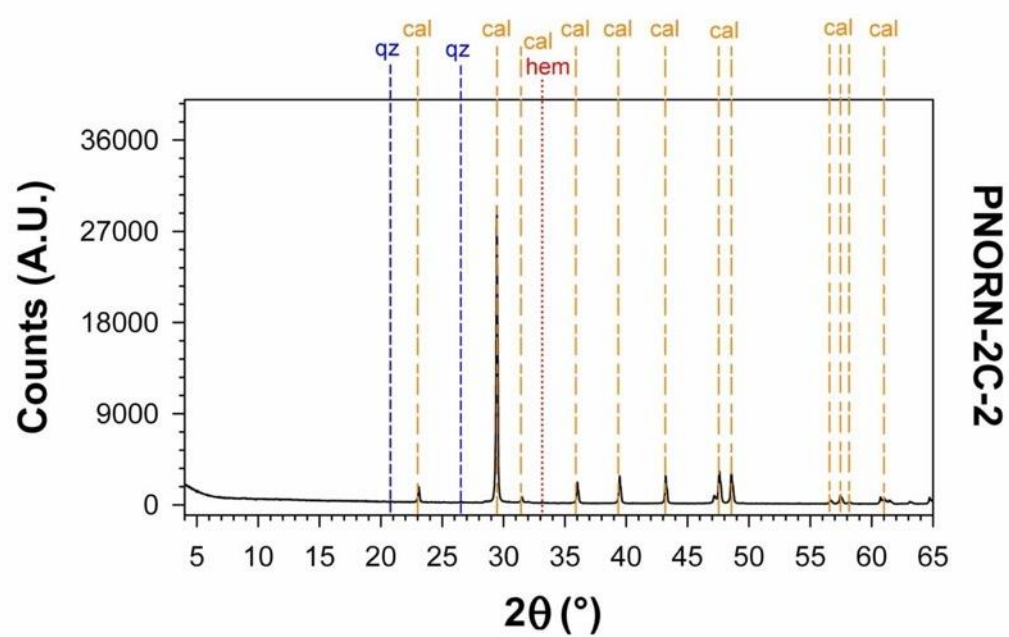

**Fig. S8** XRPD pattern of the sample PNORN-2C-2. Vertical coloured lines indicate the position of the most intense Bragg reflections of cal = calcite, hem = hematite, qz = quartz



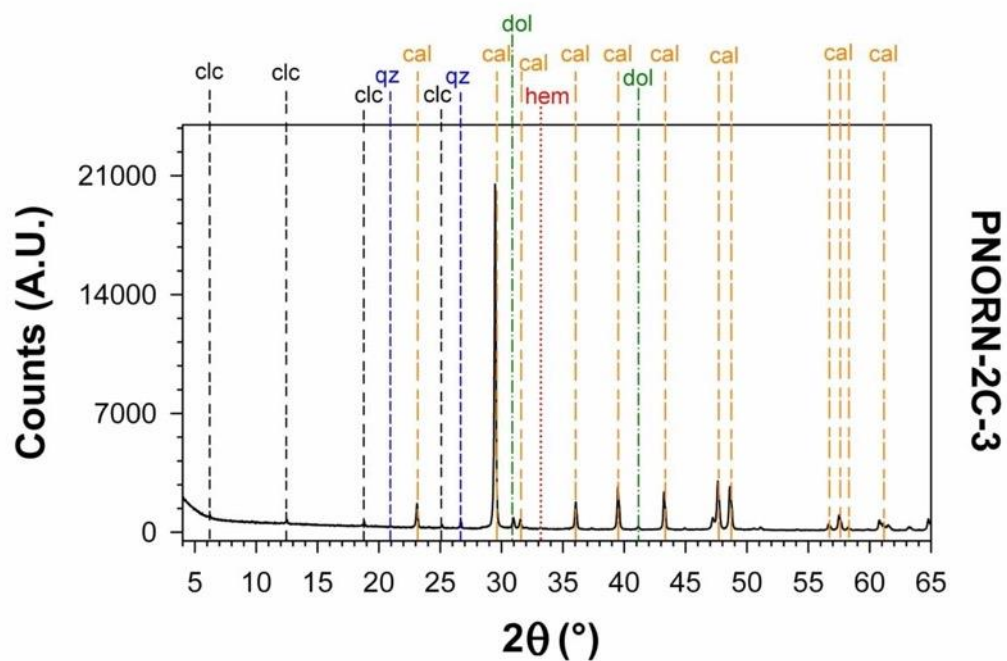

**Fig. S9** XRPD pattern for the sample PNORN-2C-3. Vertical coloured lines indicate the position of the most intense Bragg reflections of cal = calcite, dol = dolomite, hem = hematite, qz = quartz, clc = clinocllore

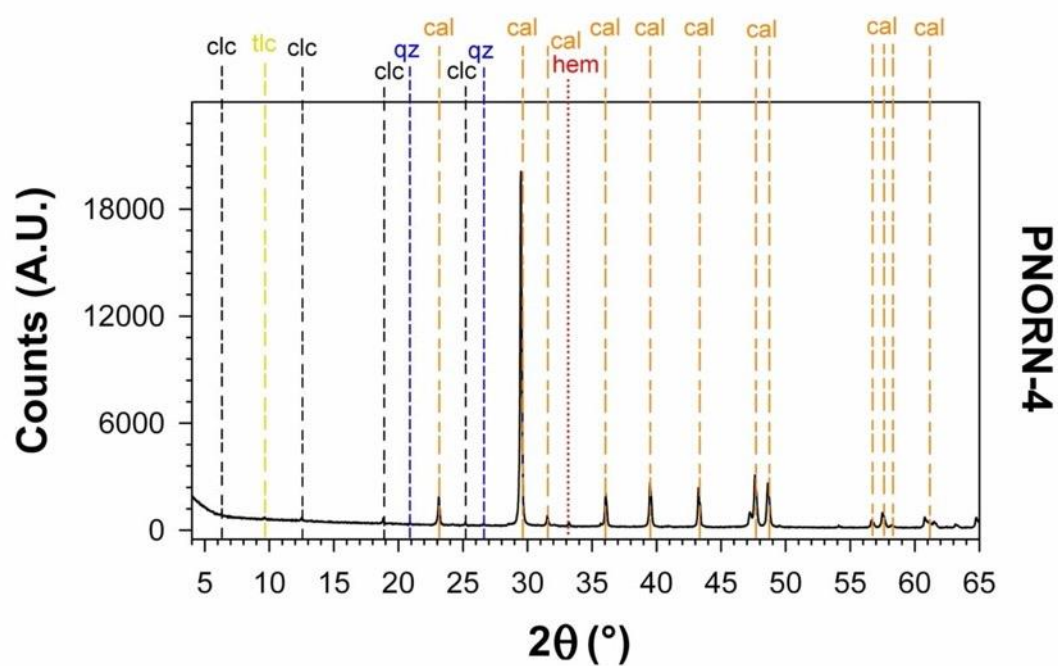

**Fig. S10** XRPD pattern for the sample PNORN-4. Vertical coloured lines indicate the position of the most intense Bragg reflections of cal = calcite, hem = hematite, qz = quartz, tlc = talc, clc = clinocllore



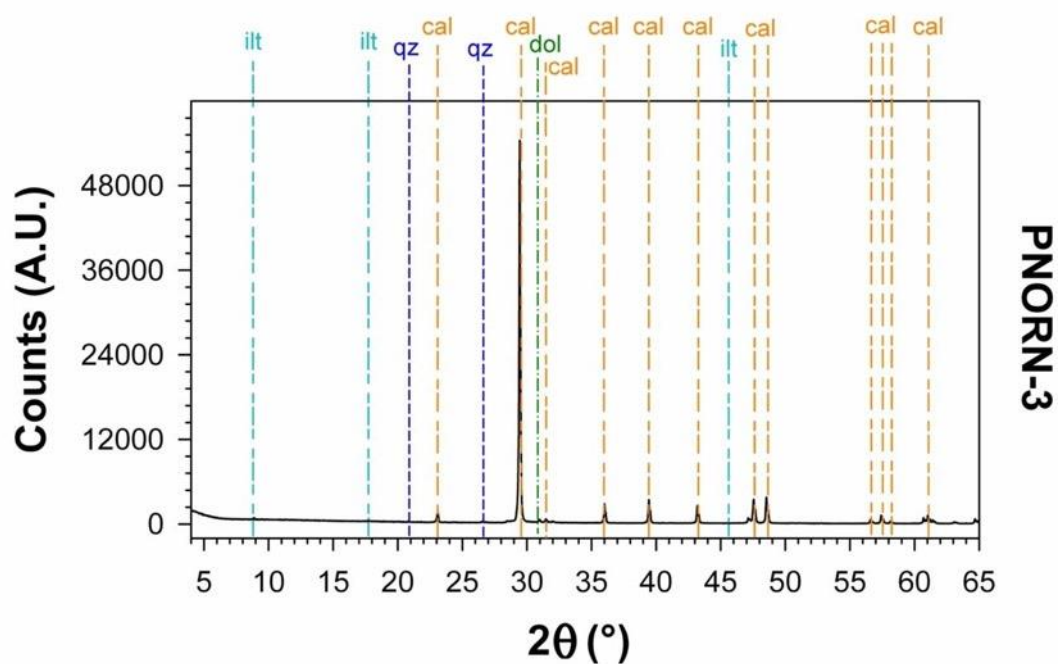

**Fig. S11** XRPD pattern for the sample PNORN-3. Vertical coloured lines indicate the position of the most intense Bragg reflections: cal = calcite, dol = dolomite, ilt = illite, qz= quartz

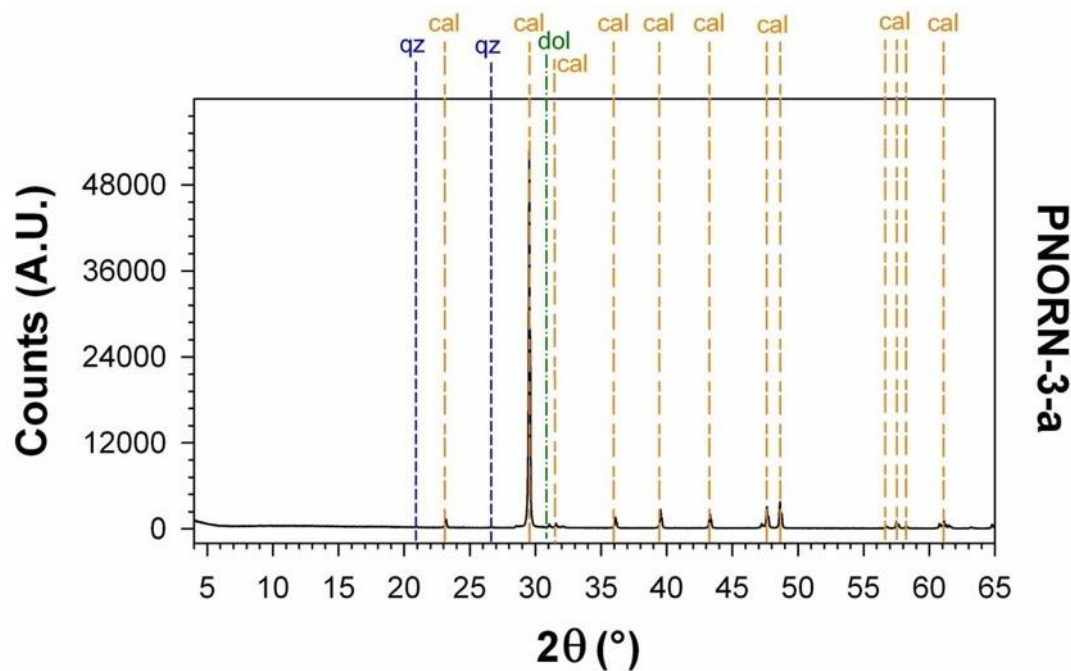

**Fig. S12** XRPD pattern for the sample PNORN-3-a. Vertical coloured lines indicate the position of the most intense Bragg reflections: cal = calcite, dol = dolomite, qz= quartz

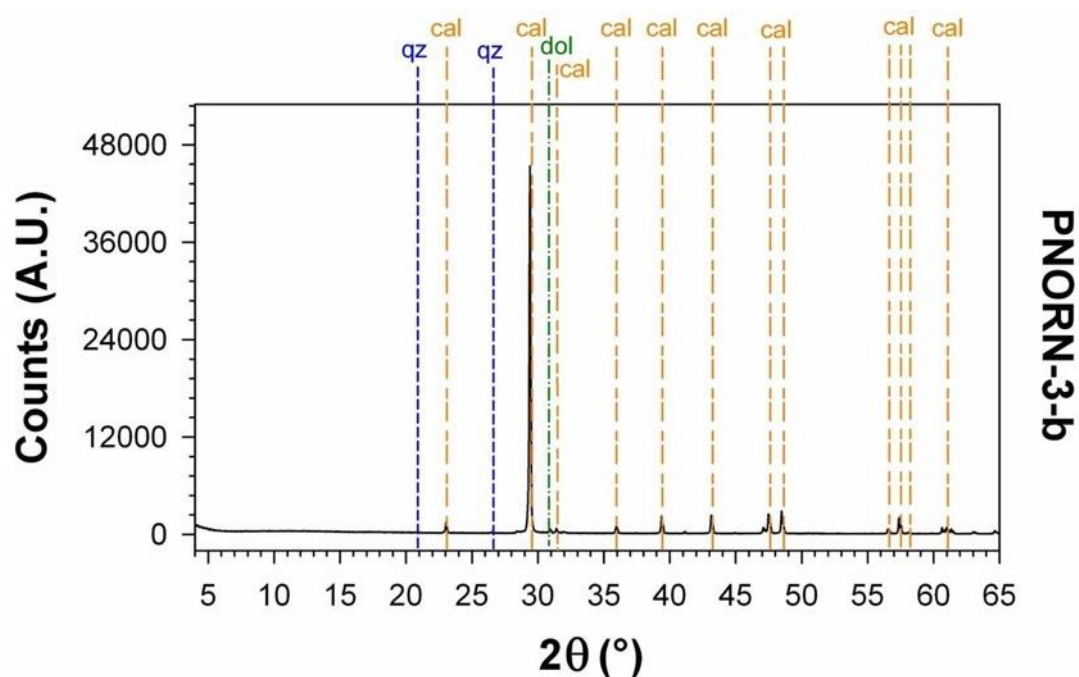

**Fig. S13** XRPD pattern for the sample PNORN-3-b. Vertical coloured lines indicate the position of the most intense Bragg reflections: cal = calcite, dol = dolomite, qz= quartz

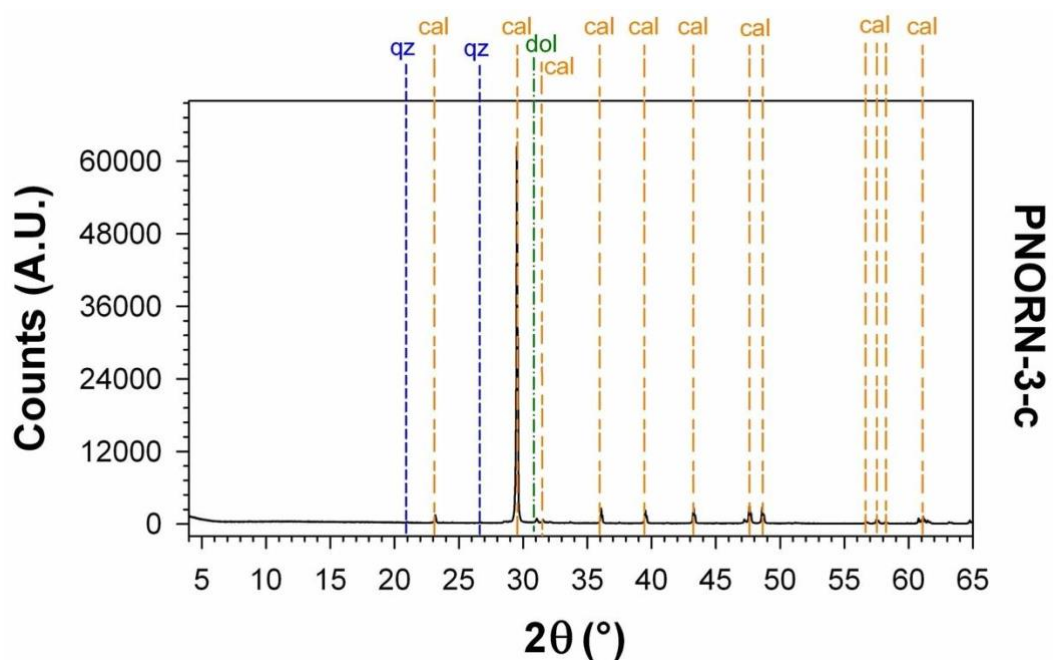

**Fig. S14** XRPD pattern for the sample PNORN-3-c. Vertical coloured lines indicate the position of the most intense Bragg reflections: cal = calcite, dol = dolomite, qz= quartz

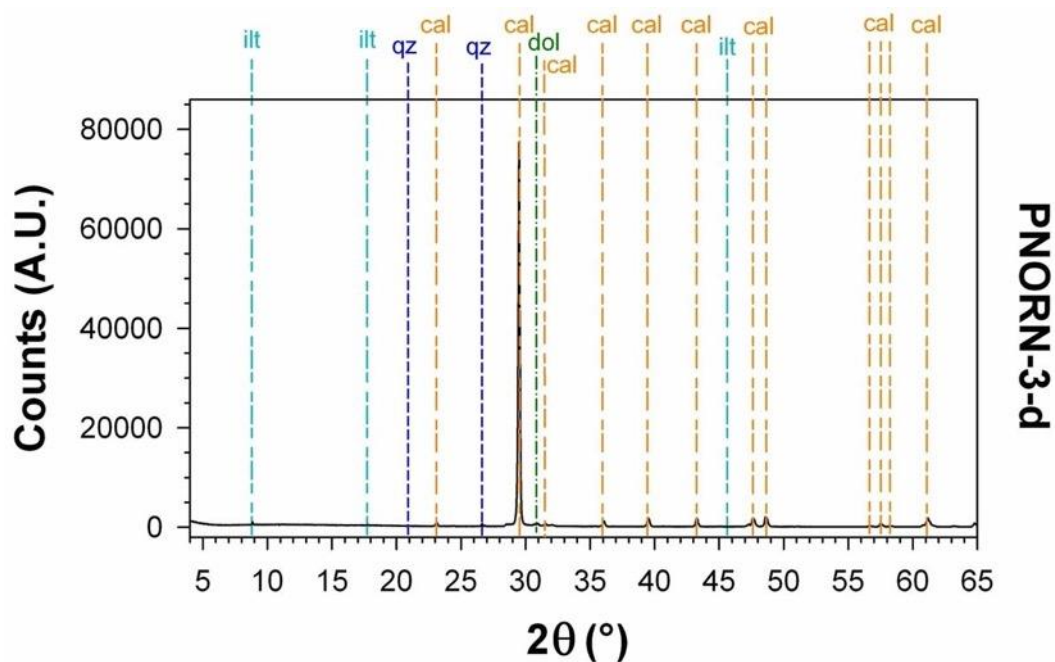

**Fig. S15** XRPD pattern for the sample PNORN-3-d. Vertical coloured lines indicate the position of the most intense Bragg reflections: cal = calcite, dol = dolomite, ilt = illite, qz= quartz

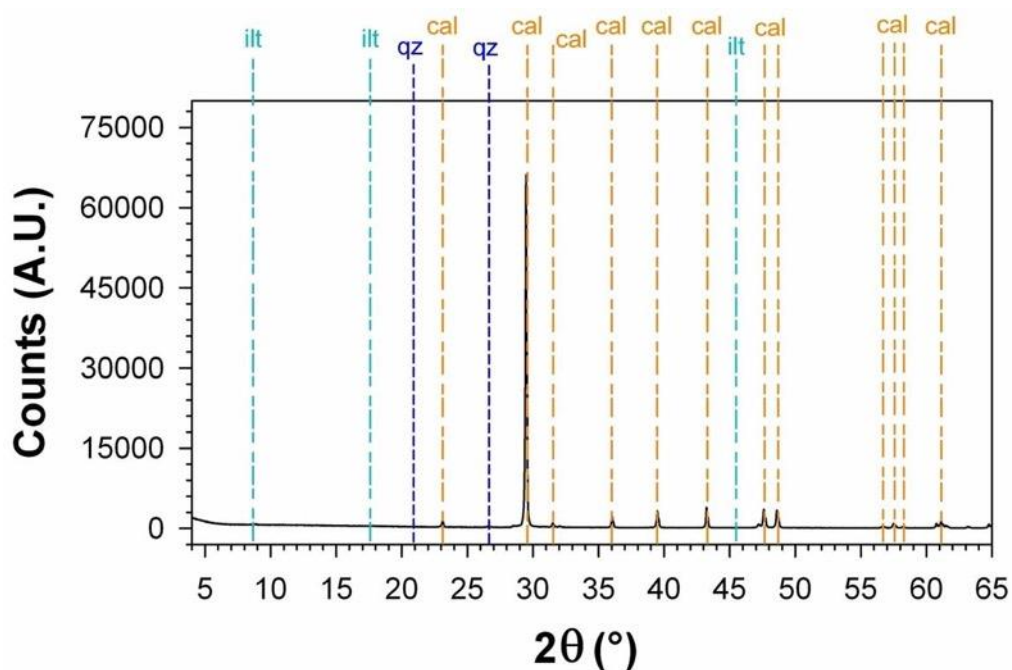

**Fig. S16** XRPD pattern for the sample PNORN-2B. Vertical coloured lines indicate the position of the most intense Bragg reflections: cal = calcite, qz = quartz, ilt = illite

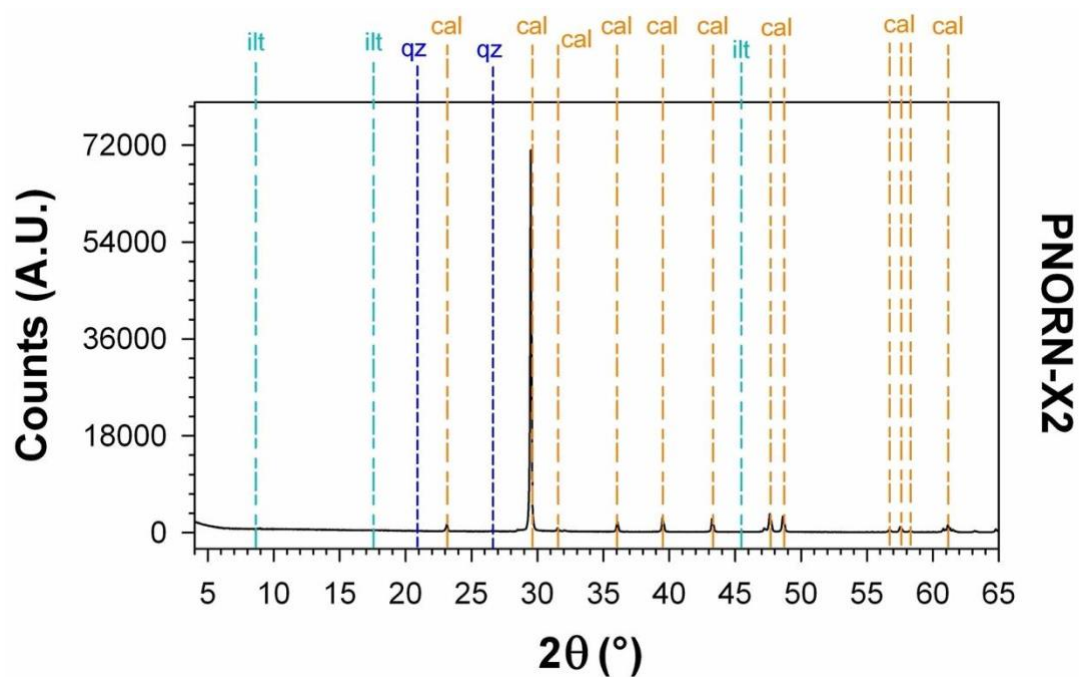

**Fig. S17** XRPD pattern for the sample PNORN-X2. Vertical coloured lines indicate the position of the most intense Bragg reflections: cal = calcite, qz = quartz, ilt = illite

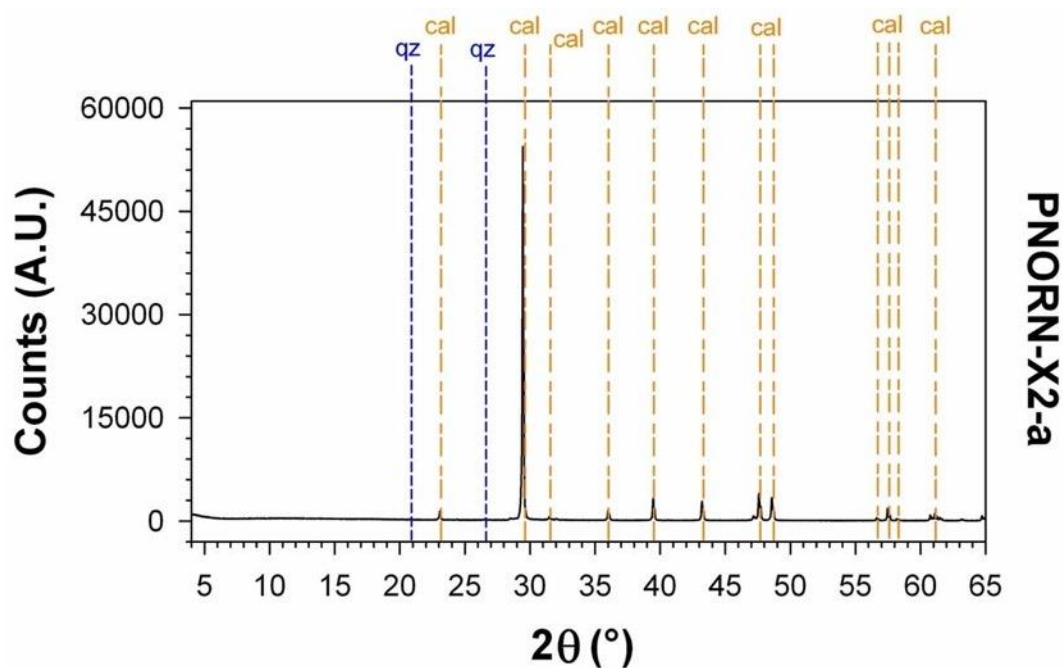

**Fig. S18** XRPD pattern for the sample PNORN-X2-a. Vertical coloured lines indicate the position of the most intense Bragg reflections: cal = calcite, qz = quartz



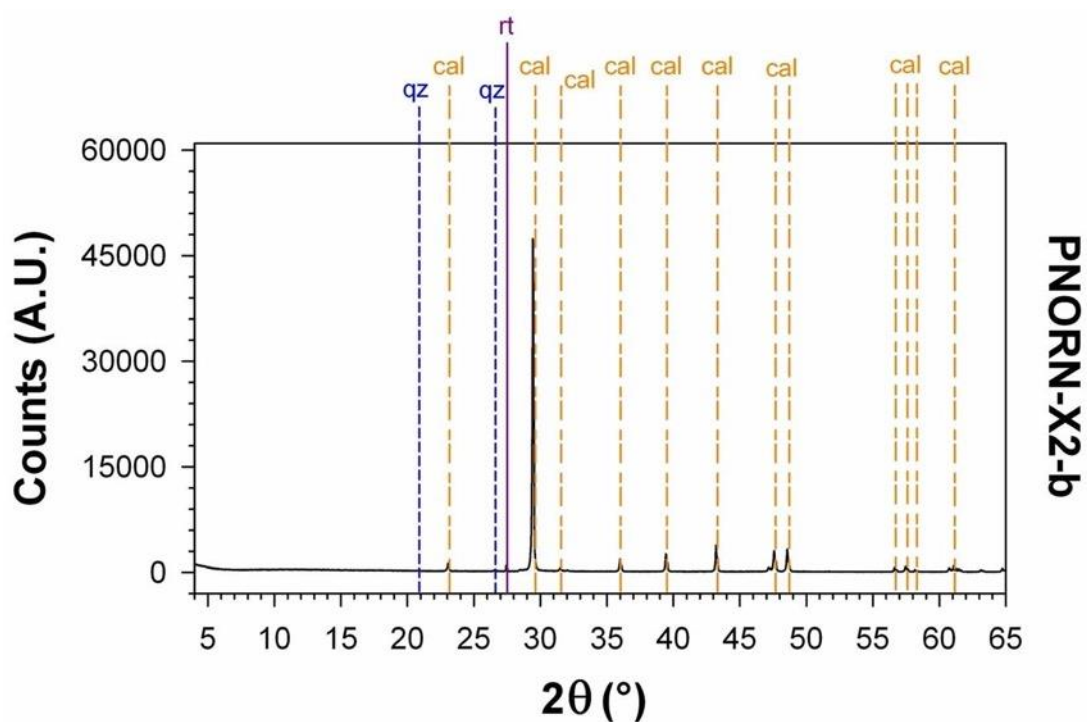

**Fig. S19** XRPD pattern for the sample PNORN-X2-b. Vertical coloured lines indicate the position of the most intense Bragg reflections: cal = calcite, qz = quartz, rt= rutile

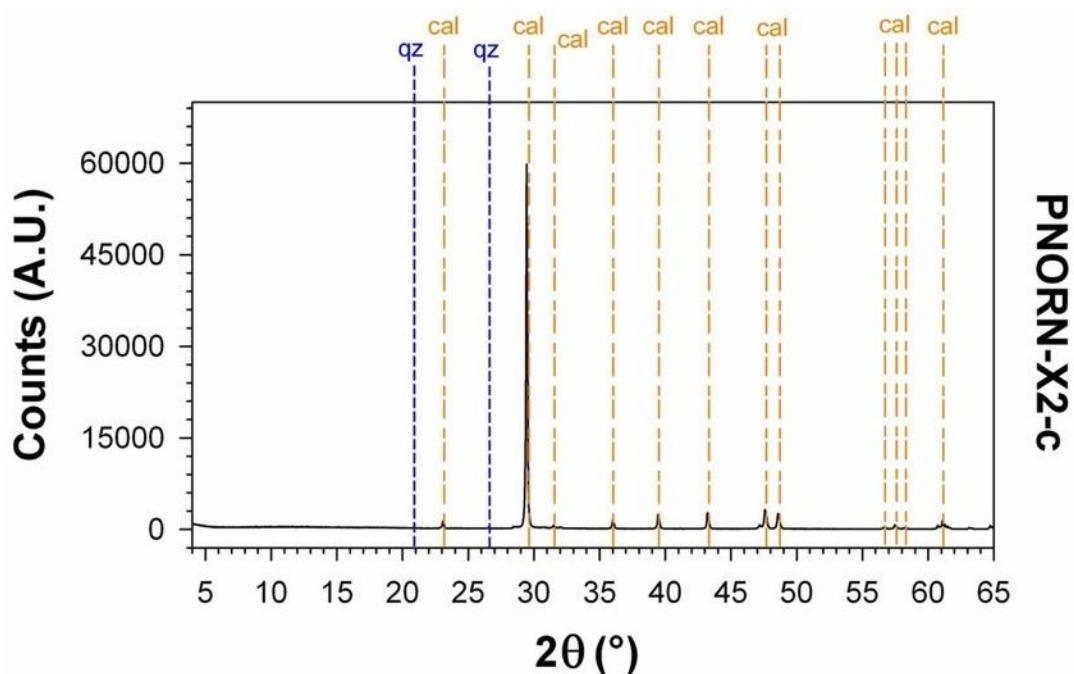

**Fig. S20** XRPD pattern for the sample PNORN-X2-c. Vertical coloured lines indicate the position of the most intense Bragg reflections: cal = calcite, qz = quartz

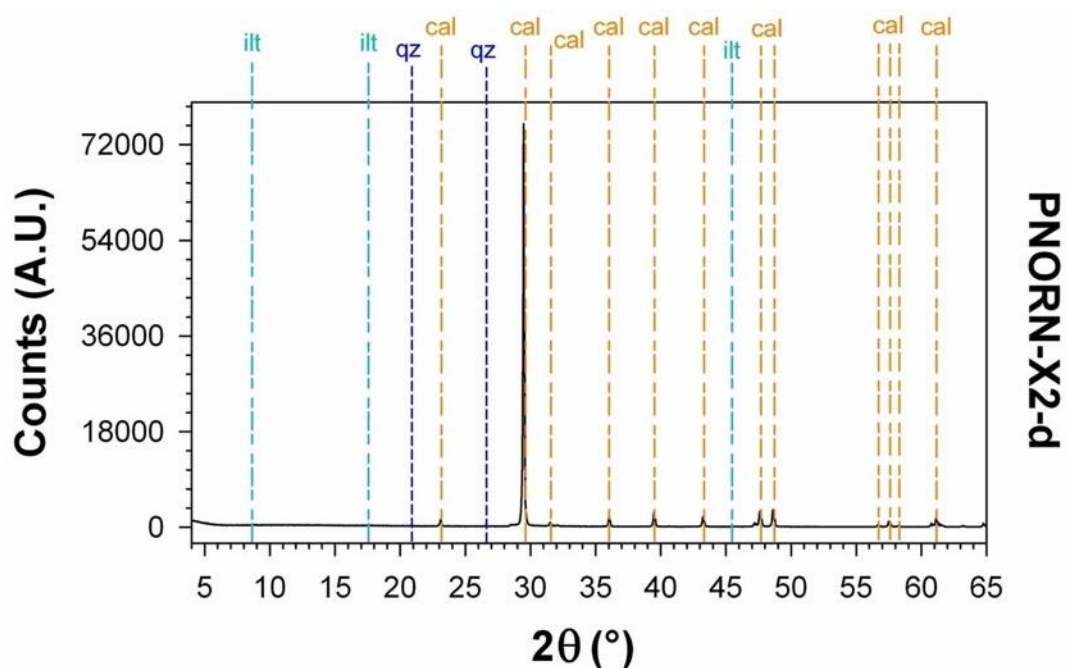

**Fig. S21** XRPD pattern for the sample PNORN-X2-d. Vertical coloured lines indicate the position of the most intense Bragg reflections: cal = calcite, qz = quartz, ilt = illite

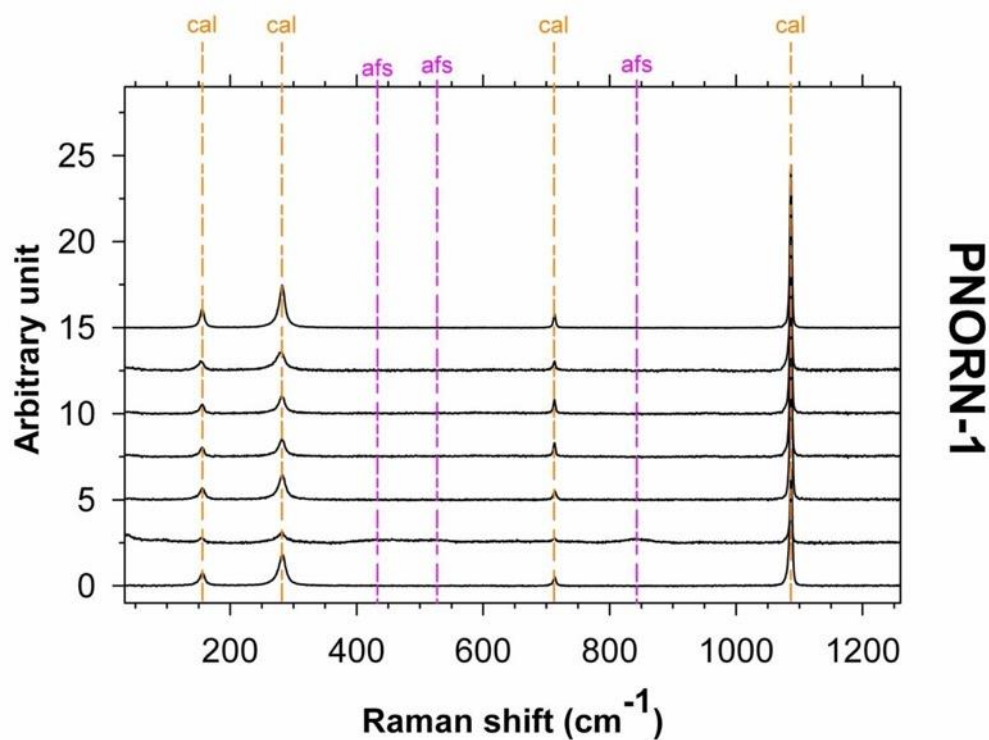

**Fig. S22** Collected Raman spectra in the 100-1250  $\text{cm}^{-1}$  region for the PNORN-1 sample. The position of the most intense Raman vibrations is reported of cal = calcite; afs = alkali feldspar

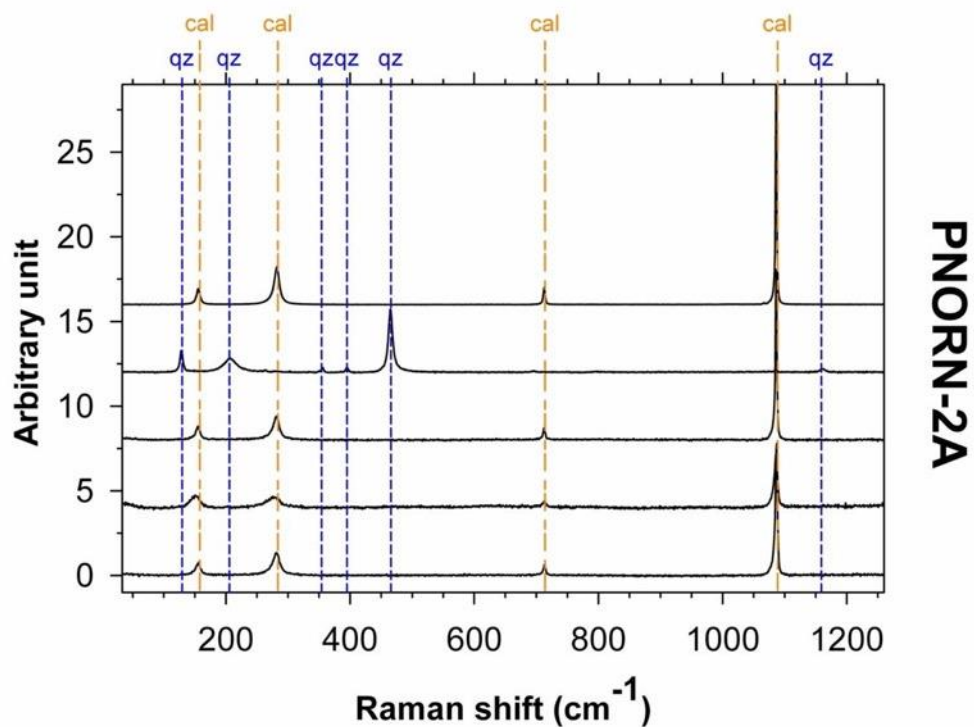

**Fig. S23** Collected Raman spectra in the 100-1250 cm<sup>-1</sup> region for PNORN-2A sample. The position of the most intense Raman vibrations is reported of cal = calcite; qz = quartz

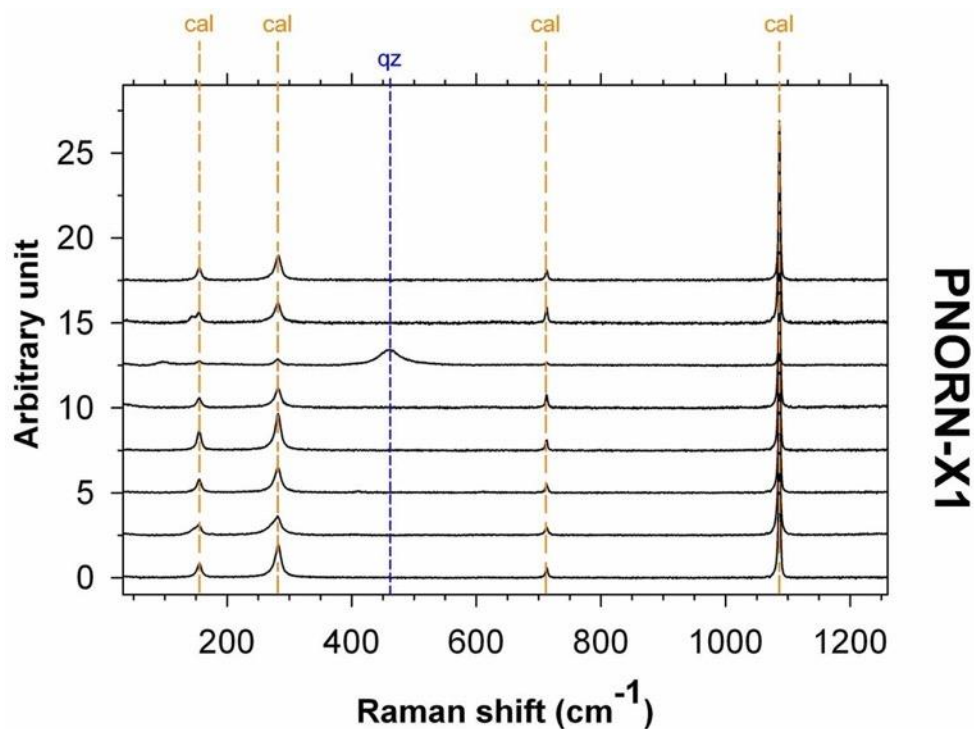

**Fig. S24** Collected Raman spectra in the 100-1250 cm<sup>-1</sup> region for PNORN-X1 sample. The position of the most intense Raman vibrations is reported of cal = calcite; qz = quartz

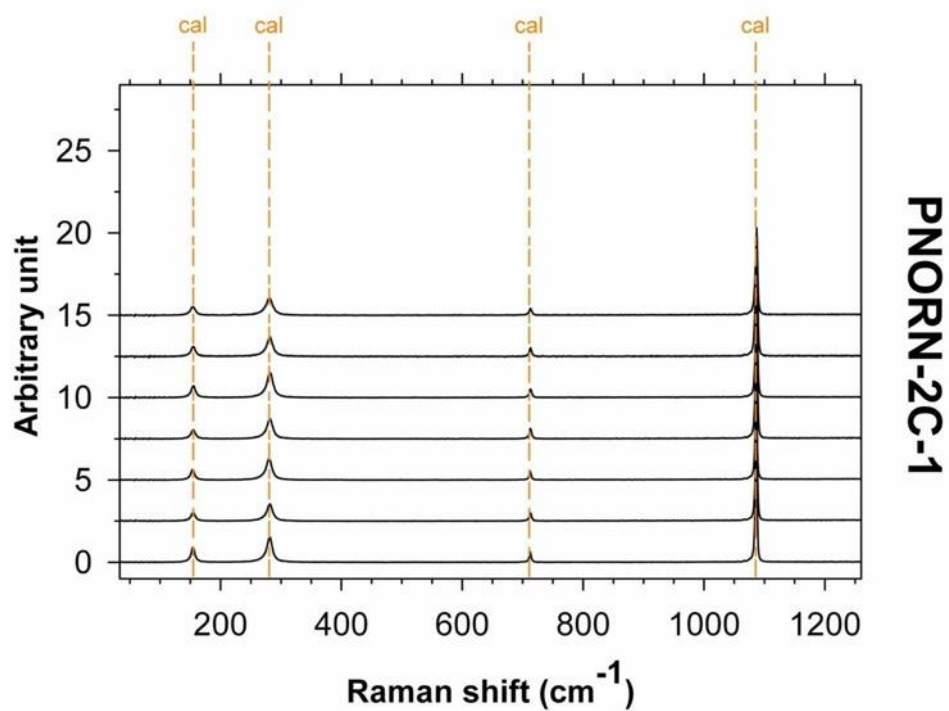

**Fig. S25** Collected Raman spectra in the 100-1250  $\text{cm}^{-1}$  region for PNORN-2C-1 sample. The position of the most intense Raman vibrations is reported of cal = calcite

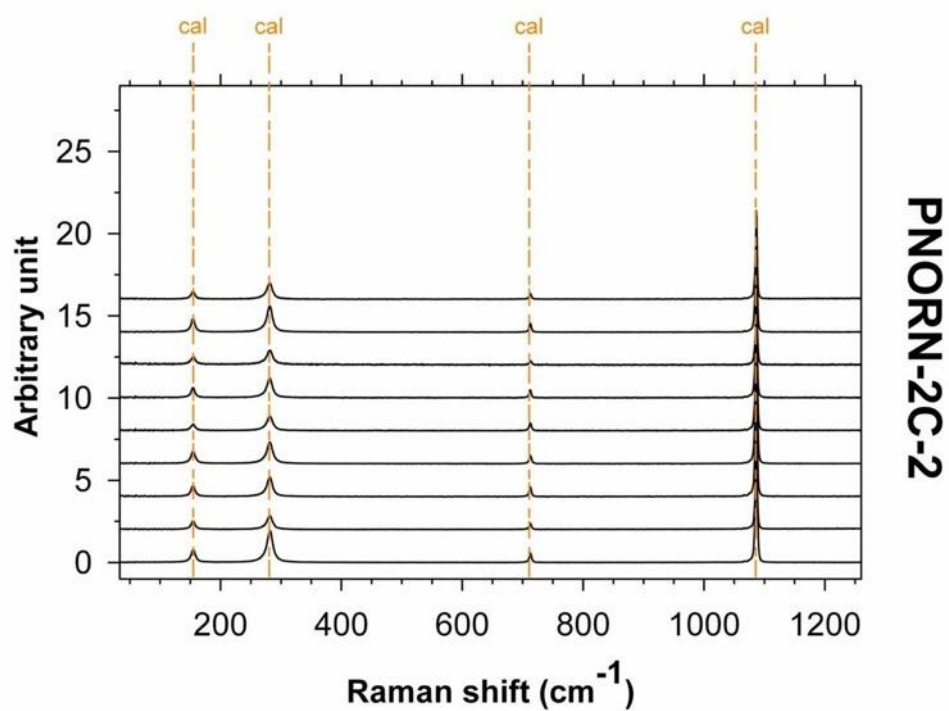

**Fig. S26** Collected Raman spectra in the 100-1250  $\text{cm}^{-1}$  region for PNORN-2C-2 sample. The position of the most intense Raman vibrations is reported of cal = calcite



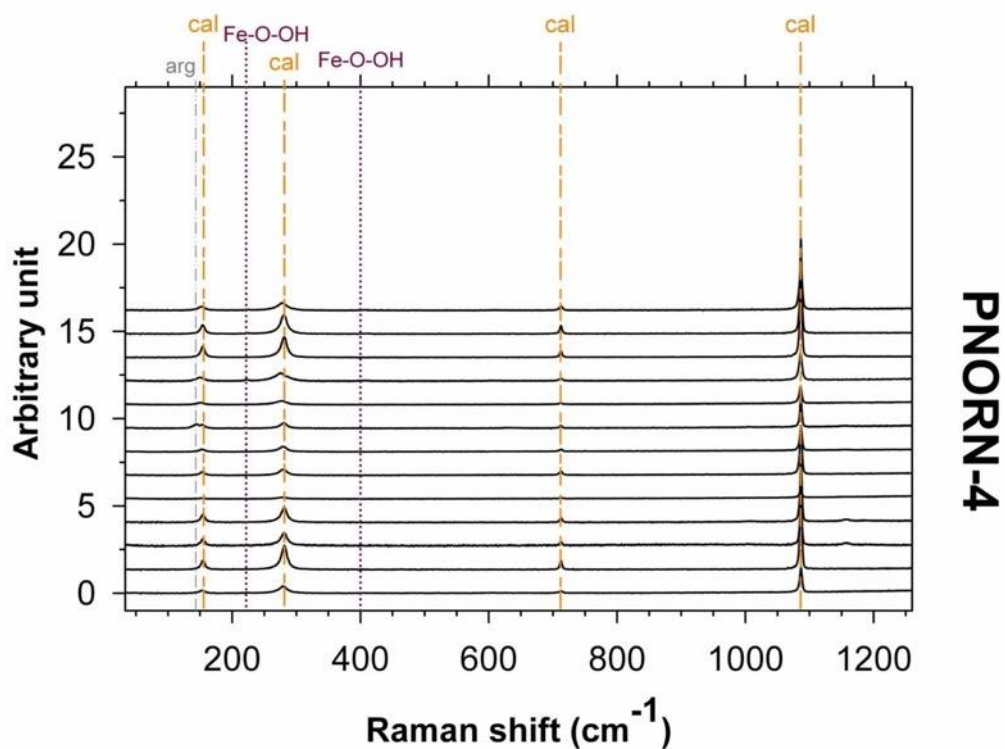

**Fig. S27** Collected Raman spectra in the 100-1250 cm<sup>-1</sup> region for PNORN-4 sample. The position of the most intense Raman vibrations is reported of cal = calcite, arg = aragonite; Fe-O-OH = Fe-oxide/hydroxide

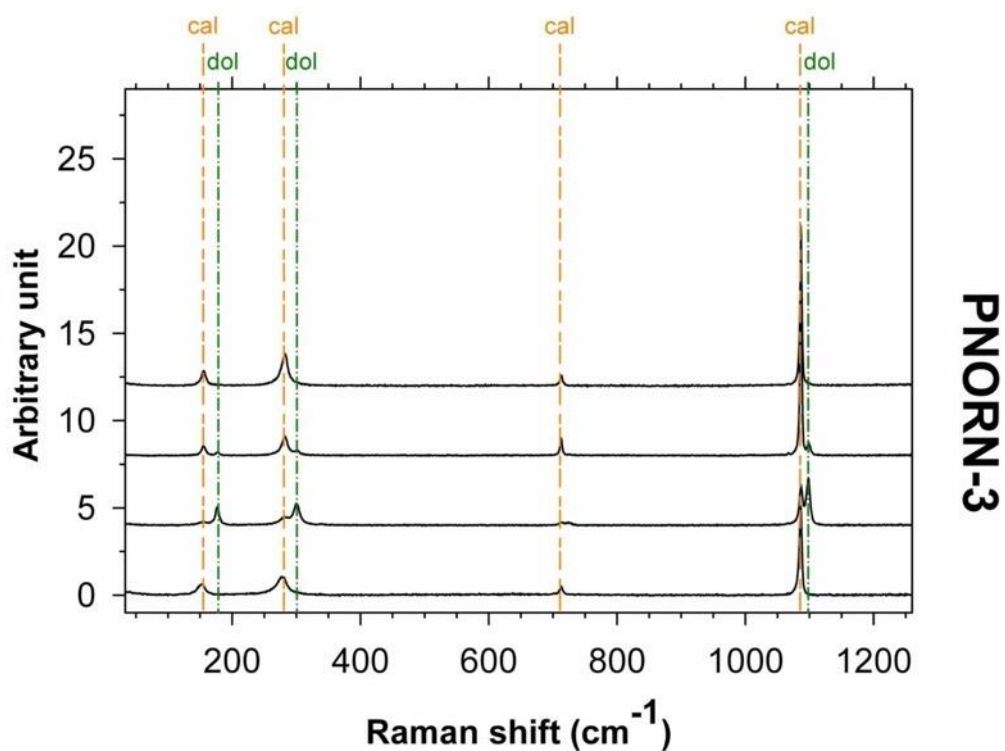

**Fig. S28** Collected Raman spectra in the 100-1250 cm<sup>-1</sup> region for PNORN-3 sample. The position of the most intense Raman vibrations is reported: cal = calcite; dol = dolomite
